# Supplementary material for: Mechanisms and Effects of Isorhamnetin on Imiquimod-Induced Psoriasiform Dermatitis in Mice
Source: MDPI journal article supplement (doi:10.3390/life12122107), 2022-12-15
Supplement: s1 [file s1]

Figure S1

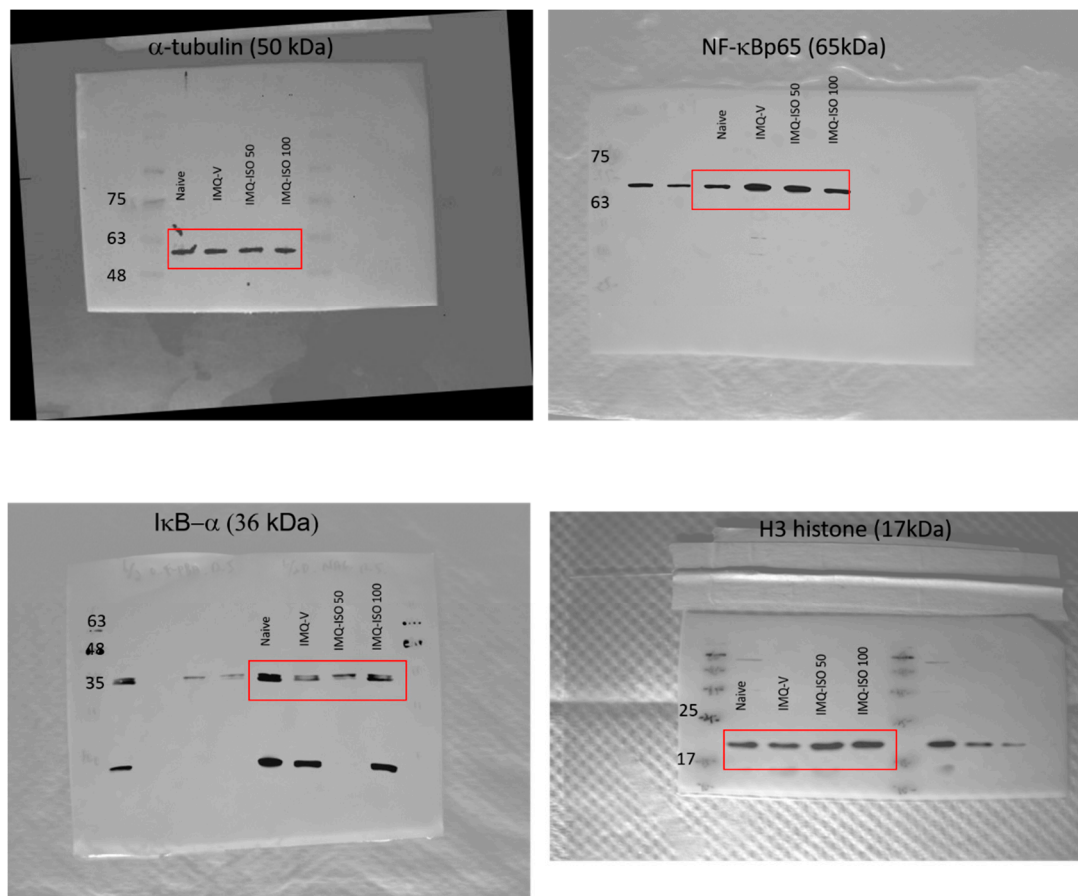

Figure S1. IRh suppressed NF-κB expression in the skin of mice with psoriasis-like lesions caused by IMQ. Expression levels of NF-κb, and IκB-α were investigated by Western blotting using , tubulin and H3 histone (nuclear) as a loading control.
